# Supplementary material for: A new method for creating Se–N intramolecular bonds using UV radiation
Source: Royal Society of Chemistry journal article supplement (doi:10.1039/d2nj03513h), 2022-01-01
Supplement: d2nj03513h1.pdf [file d2nj03513h1.pdf]

# Supporting Information

## New UV-light initiated intramolecular Se-N bond formation

Agata J. Pacuła-Miszewska<sup>a</sup>, Magdalena Obieziurska-Fabisiak<sup>a</sup>, Anna Laskowska<sup>a</sup>,  
Halina Kaczmarek<sup>b</sup> and Jacek Ścianowski<sup>a</sup>

### Table of Content

|                                                                                                                                                                                                                                                                                                                |    |
|----------------------------------------------------------------------------------------------------------------------------------------------------------------------------------------------------------------------------------------------------------------------------------------------------------------|----|
| I. Synthesis of diselenides <b>21a</b> and <b>22a</b> .....                                                                                                                                                                                                                                                    | 2  |
| II. Synthesis of benzoselenazol-2(H)-ones <b>21</b> and <b>22</b> .....                                                                                                                                                                                                                                        | 3  |
| III. <sup>1</sup> H, <sup>13</sup> C and <sup>77</sup> Se NMR spectra for compounds <b>21a</b> , <b>22a</b> , <b>21</b> and <b>22</b> .....                                                                                                                                                                    | 4  |
| IV. <sup>1</sup> H NMR spectra for compounds <b>10</b> , <b>11</b> , <b>12a</b> , <b>12</b> , <b>13a</b> , <b>13</b> , <b>14a</b> , <b>14</b> , <b>15a</b> , <b>15</b> , <b>16a</b> , <b>16</b> , <b>17a</b> , <b>17</b> ,<br><b>18a</b> , <b>18</b> , <b>19a</b> , <b>19</b> , <b>20a</b> , <b>20</b> , ..... | 10 |
| V. References.....                                                                                                                                                                                                                                                                                             | 20 |

## II. Synthesis of diselenides **21a** and **22a**

To a solution of benzoselenazol-3(2H)-one (1.0 mmol; obtained by our previously published procedure ([Method A](#)): A.J Pacuła, K. B. Kaczor, A. Wojtowicz, J. Antosiewicz, A. Janecka, A. Długosz, T. Janecki and J. Scianowski, *Bioorg. Med. Chem.*, 2017, **25**, 126–131) in methanol (10 ml) cooled to 0°C, sodium borohydride (1.0 mmol) was added and the mixture was stirred for 1h. Water (15ml) was added and the mixture was oxidized with air for 1h. Formed precipitate was filtered and dried in air.

### **2,2'-Diselenobis((4-(Trifluoromethyl)phenyl)benzamide) 21a**

Yield: 70%, mp 228-230°C;

<sup>1</sup>H NMR (700 MHz, DMSO)  $\delta$  = 7.42 (dt,  $J$ =7.0, 0.7 Hz, 1H<sub>ar</sub>), 7.47 (dt,  $J$ =7.0, 1.4 Hz, 1H<sub>ar</sub>), 7.75 (d,  $J$ =8.4, 2H<sub>ar</sub>), 7.78 (dd,  $J$ =7.7, 0.7 Hz, 1H<sub>ar</sub>), 7.97-7.99 (m, 3H<sub>ar</sub>), 10.86 (s, NH) ppm; <sup>13</sup>C NMR (100.61 Hz, DMSO)  $\delta$  = 120.24, 120.89, 123.47, 124.40, 124.72, 126.17, 126.48 (q), 127.03, 129.40, 130.82, 132.13, 132.63, 132.88, 133.85, 139.08, 142.80, 167.26 (C=O) ppm; <sup>77</sup>Se (133.55 MHz, DMSO),  $\delta$  = 446.68 ppm; IR: 3314, 1649, 1615, 1600, 1563, 1523, 1517, 1461, 1429, 1409, 1322, 1269, 1256, 1186, 1157, 1114, 1067, 1047, 1017 cm<sup>-1</sup>; Elemental Anal. Calcd for C<sub>28</sub>H<sub>18</sub>F<sub>6</sub>N<sub>2</sub>O<sub>2</sub>Se<sub>2</sub> (687.96): C, 49.00; H, 2.64, Found: C, 48.89; H, 2.59. Elemental Anal. Calcd for C<sub>28</sub>H<sub>18</sub>F<sub>6</sub>N<sub>2</sub>O<sub>2</sub>Se<sub>2</sub> (687.96): C, 49.00; H, 2.64, Found: C, 49.23; H, 2.71.

### **2,2'-Diselenobis((2-(Trifluoromethyl)phenyl)benzamide) 22a**

Yield: 74%, mp 277-279°C;

<sup>1</sup>H NMR (700 MHz, DMSO)  $\delta$  = 7.45 (dt,  $J$ =7.7, 1.4 Hz, 1H<sub>ar</sub>), 7.49 (dt,  $J$ =8.4, 1.4 Hz, 1H<sub>ar</sub>), 7.59-7.61 (m, 2H<sub>ar</sub>), 7.78-7.81 (m, 2H<sub>ar</sub>), 7.85 (d,  $J$ =7.7, 1H<sub>ar</sub>), 8.00 (d,  $J$ =7.0, 1H<sub>ar</sub>), 10.51 (s, NH) ppm; <sup>13</sup>C NMR (100.61 Hz, DMSO)  $\delta$  = 122.71, 125.43, 126.95, 127.13 (q), 128.33, 129.02, 130.66, 131.81, 132.75, 133.01, 133.80, 135.72, 167.89 (C=O) ppm; <sup>77</sup>Se (133.67MHz, DMSO),  $\delta$  = 446.29 ppm; IR: 3280, 1643, 1610, 1587, 1525, 1487, 1454, 1321, 1306, 1288, 1267, 1256, 1173, 1141, 1110, 1060, 1036 cm<sup>-1</sup>; Elemental Anal. Calcd for C<sub>28</sub>H<sub>18</sub>F<sub>6</sub>N<sub>2</sub>O<sub>2</sub>Se<sub>2</sub> (687.96): C, 49.00; H, 2.64, Found: C, 48.89; H, 2.59

## II. Synthesis of benzoselenazol-2(H)-ones **21** and **22**

**Method A:** To a solution of amine (2.0 mmol) and triethylamine (4.0 mmol) in dichloromethane (10 ml) 2-(chloroseleno)benzoyl chloride (2.0 mmol) was added. The mixture was stirred for 24h at room temperature, poured on water and extracted with DCM. The combined organic layers were dried over anhydrous magnesium sulfate and evaporated. The crude product was purified by column chromatography (silica gel, dichlorometane).

**Method B:** A solution of the starting diselenide **21a/22a** in acetonitrile (0.01M) was placed in a 5ml quartz cuvette and irradiated for 1h by 250 nm wavelength UV lamp. The solution was poured into a 10ml flask and evaporated. The final product was isolated by column chromatography (DCM, neutral aluminium oxide).

### ***N*-4-(Trifluoromethyl)phenyl-1,2-benzisoselenazol-3(2*H*)-one **21****

Yield: 46% (Method A); Yield: 90% (Method B); mp 228-230°C;

$^1\text{H}$  NMR (700 MHz, DMSO)  $\delta$  = 7.48 (dt,  $J=7.7$ , 0.7 Hz, 1 $H_{\text{ar}}$ ), 7.69 (dt,  $J=8.4$ , 1.4 Hz, 1 $H_{\text{ar}}$ ), 7.78 (d,  $J=8.4$ , 2 $H_{\text{ar}}$ ), 7.91-7.93 (m, 3 $H_{\text{ar}}$ ), 8.09 (d,  $J=7.7$ , 1 $H_{\text{ar}}$ ) ppm;  $^{13}\text{C}$  NMR (176.10 MHz, DMSO)  $\delta$  = 123.85, 124.74, 125.39, 125.78, 125.96, 126.35, 126.80 (q), 128.61, 128.87, 133.19, 139.16, 144.17, 165.95 (C=O) ppm;  $^{77}\text{Se}$  (133.55 MHz, DMSO),  $\delta$  = 975.57 ppm; IR: 2922, 1624, 1597, 1568, 1513, 1445, 1419, 1320, 1305, 1268, 1192, 1174, 1107, 1070, 1014  $\text{cm}^{-1}$ ; Elemental Anal. Calcd for  $\text{C}_{14}\text{H}_8\text{F}_3\text{NOSe}$  (342.97): C, 49.14; H, 2.36, Found: C, 48.95; H, 2.29.

### ***N*-2-(Trifluoromethyl)phenyl-1,2-benzisoselenazol-3(2*H*)-one **22****

Yield: 41% (Method A); Yield: 89% (Method B); ( mp 199-201°C;

$^1\text{H}$  NMR (700 MHz, DMSO)  $\delta$  = 7.47 (dt,  $J=7.7$ , 0.7 Hz, 1 $H_{\text{ar}}$ ), 7.49 (d,  $J=7.7$ , 1 $H_{\text{ar}}$ ), 7.65 (t,  $J=7.7$ , 1 $H_{\text{ar}}$ ), 7.68 (dt,  $J=7.7$ , 0.7 Hz, 1 $H_{\text{ar}}$ ), 7.77 (t,  $J=7.0$ , 1 $H_{\text{ar}}$ ), 7.85 (d,  $J=8.4$ , 2 $H_{\text{ar}}$ ), 8.05 (d,  $J=8.4$ , 1 $H_{\text{ar}}$ ) ppm;  $^{13}\text{C}$  NMR (176.10 MHz, DMSO)  $\delta$  = 123.01, 124.57, 126.31, 126.69, 126.83, 127.64 (q), 128.39, 128.83, 129.00, 129.52, 132.75, 132.96, 134.15, 137.49, 140.90, 167.36 (C=O) ppm;  $^{77}\text{Se}$  (133.6 MHz, DMSO),  $\delta$  = 975.63 ppm; IR: 3064, 1590, 1561, 1496, 1454, 1443, 1347, 1317, 1272, 1260, 1221, 1175, 1164, 1128, 1117, 1109, 1058, 1034, 1025  $\text{cm}^{-1}$ ; Elemental Anal. Calcd for  $\text{C}_{14}\text{H}_8\text{F}_3\text{NOSe}$  (342.97): C, 49.14; H, 2.36, Found: C, 49.33; H, 2.39.

III.  $^1\text{H}$ ,  $^{13}\text{C}$  and  $^{77}\text{Se}$  NMR spectra for compounds **21a**, **22a**, **21** and **22**

***N*-4-(Trifluoromethyl)phenyl-1,2-benziselenazol-3(2*H*)-one **21****

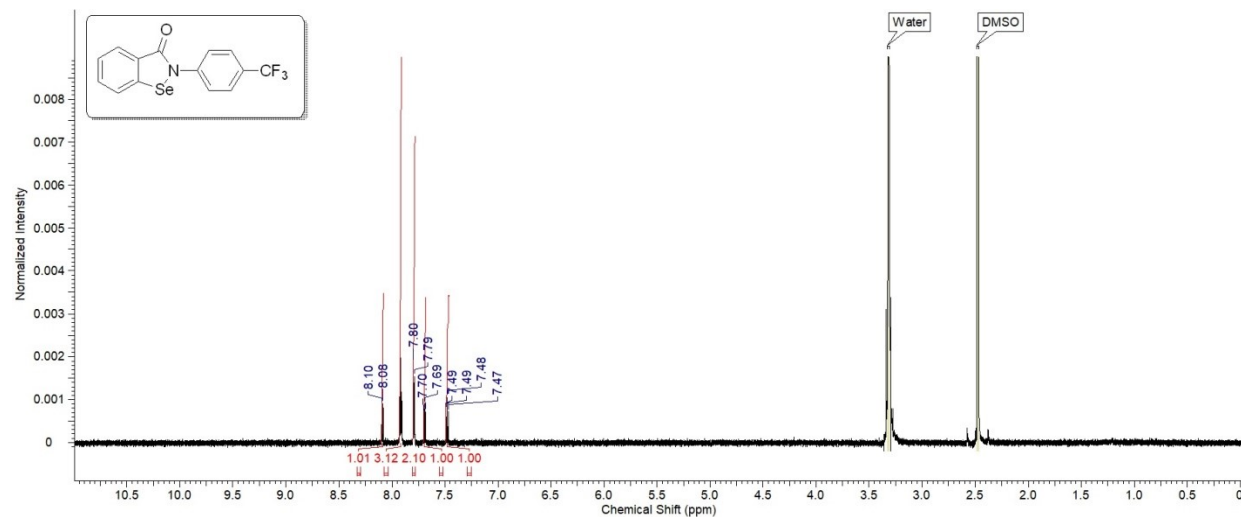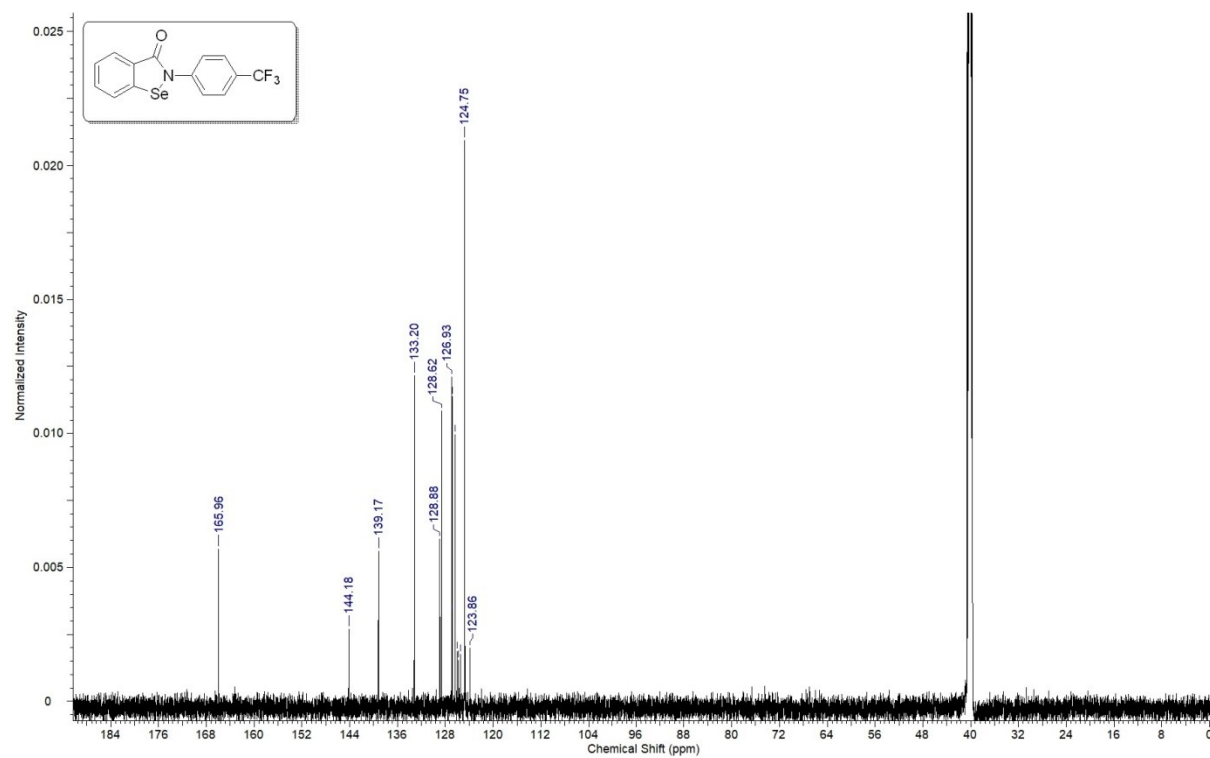

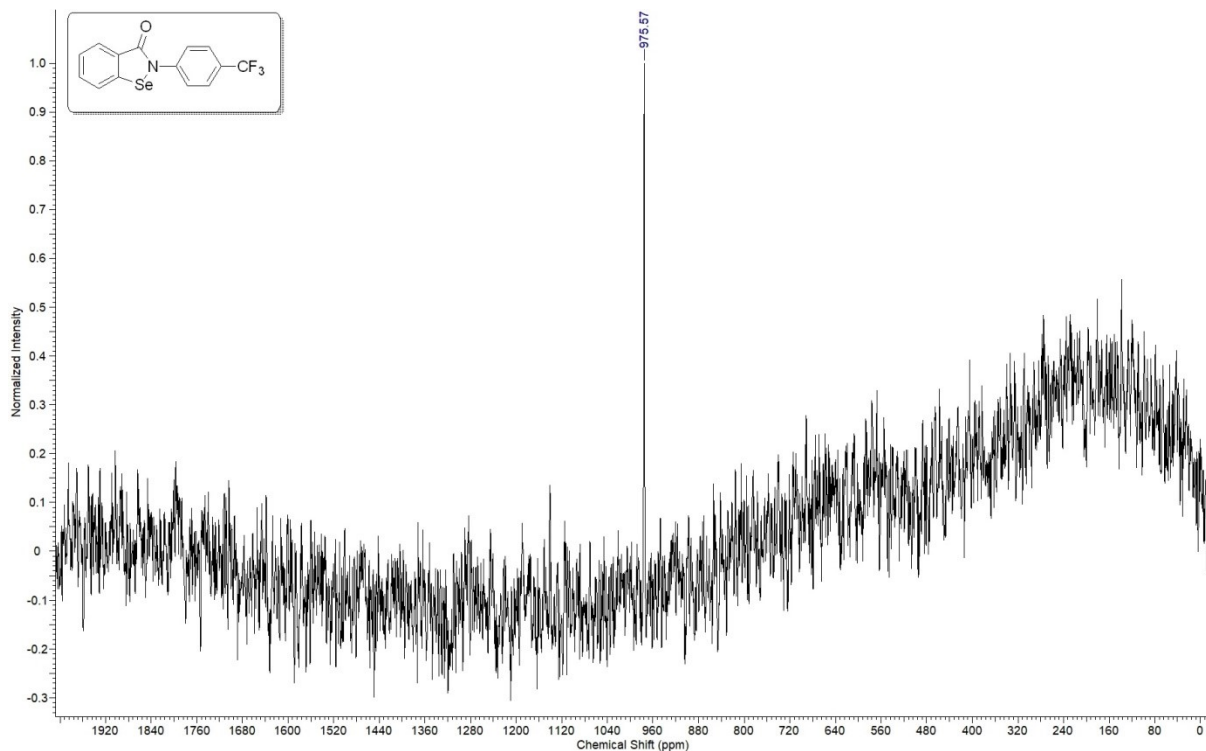

***N*-(2-(Trifluoromethyl)phenyl)-1,2-benziselenazol-3(2H)-one 22**

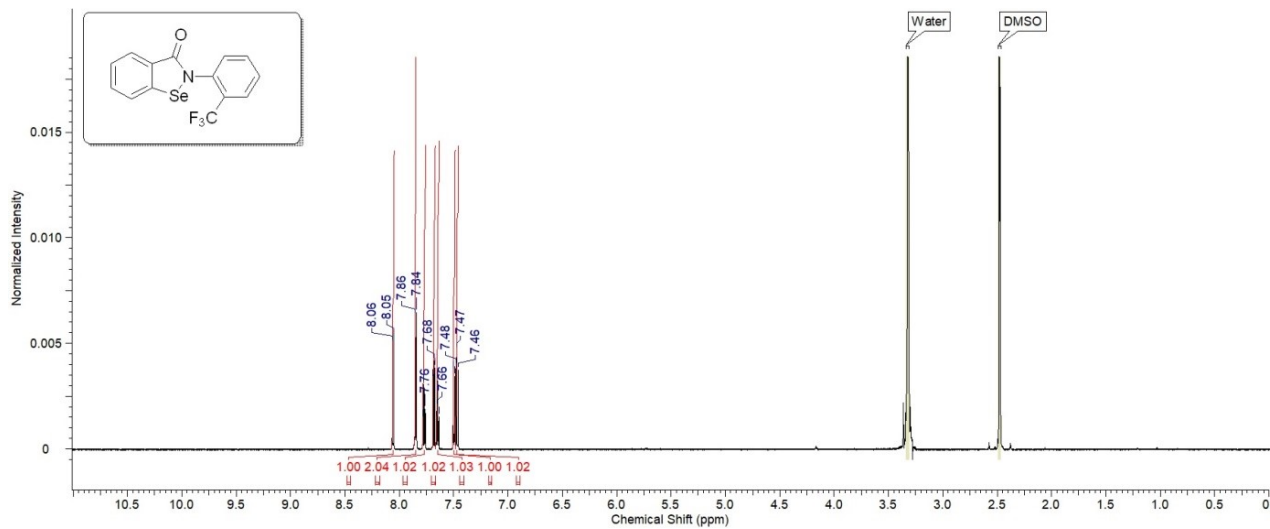

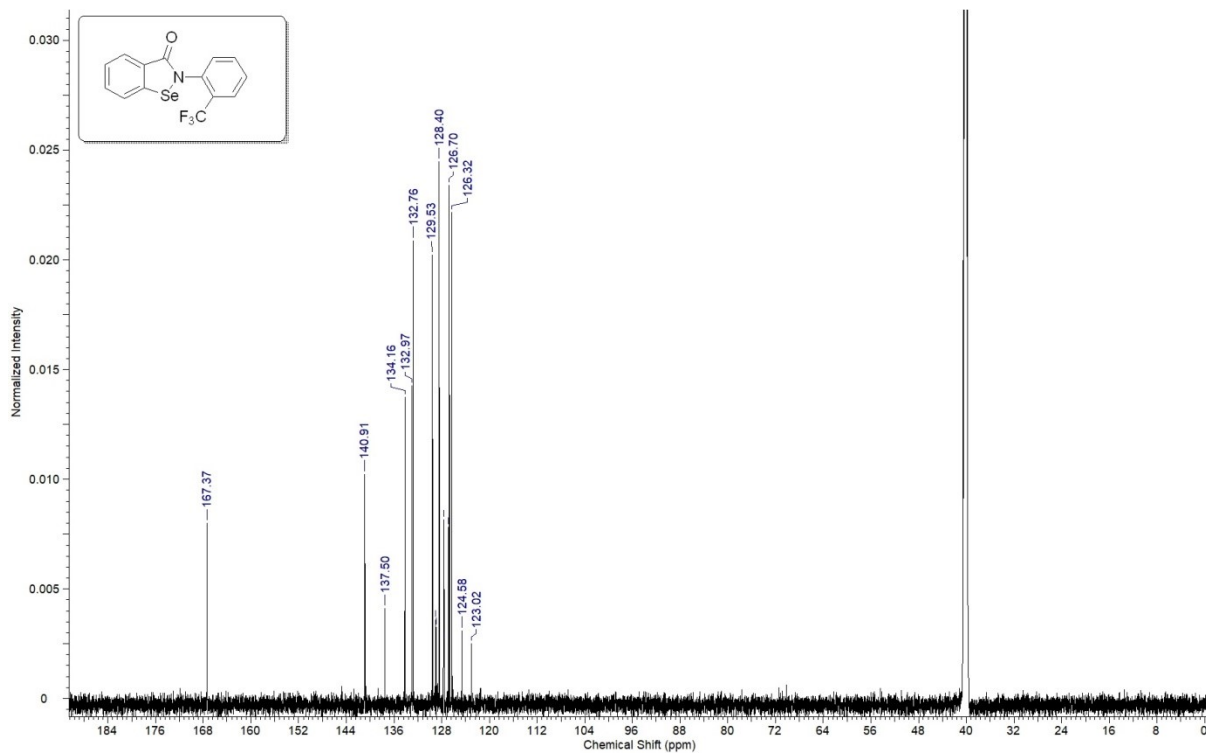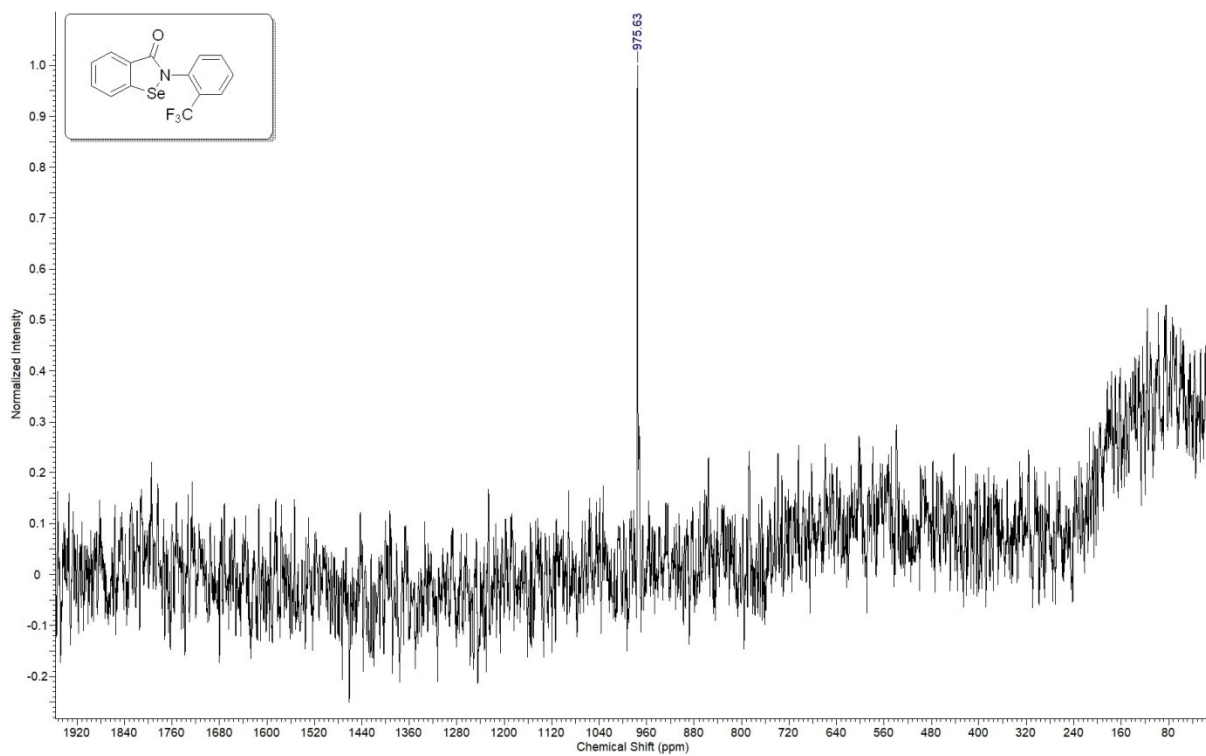

## 2,2'-Diselenobis((4-(Trifluoromethyl)phenyl)benzamide) 21a

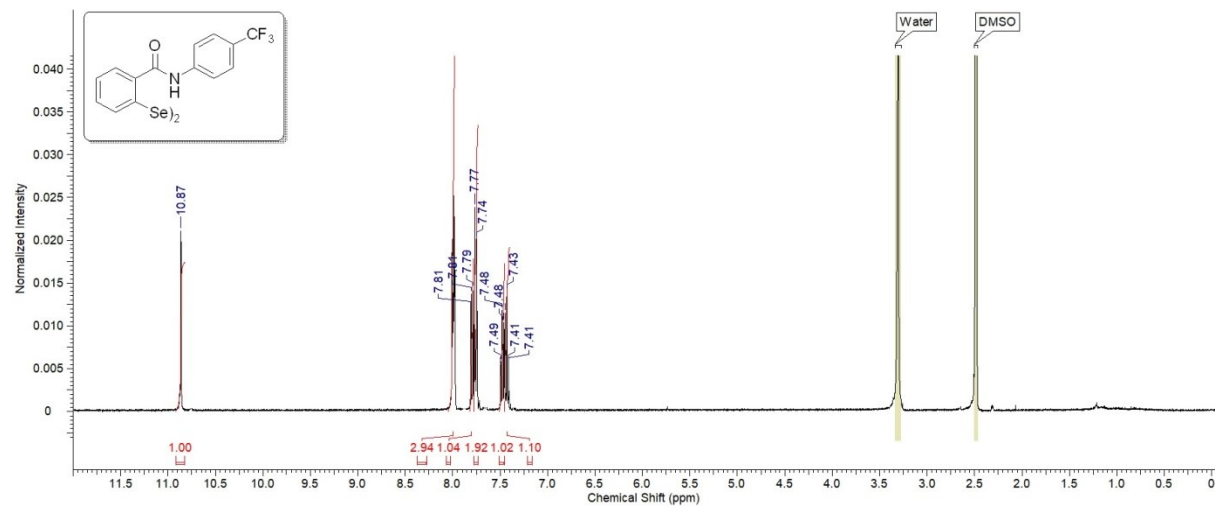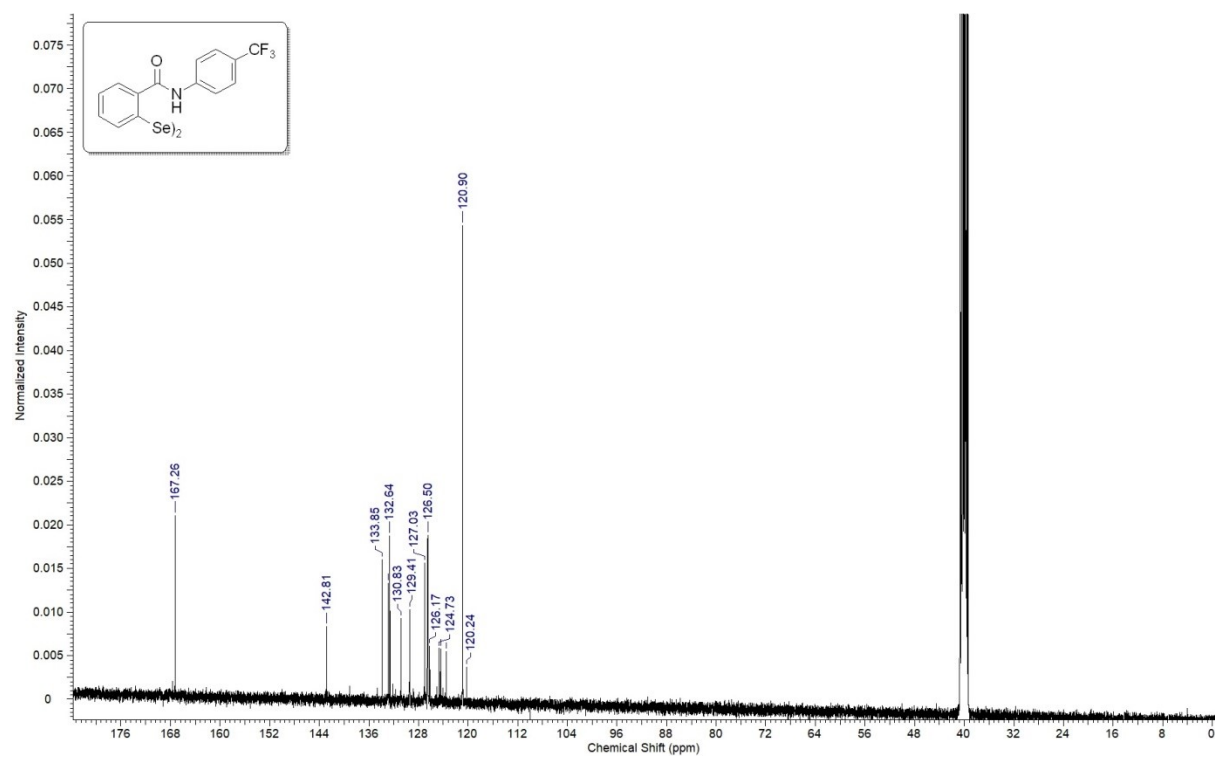

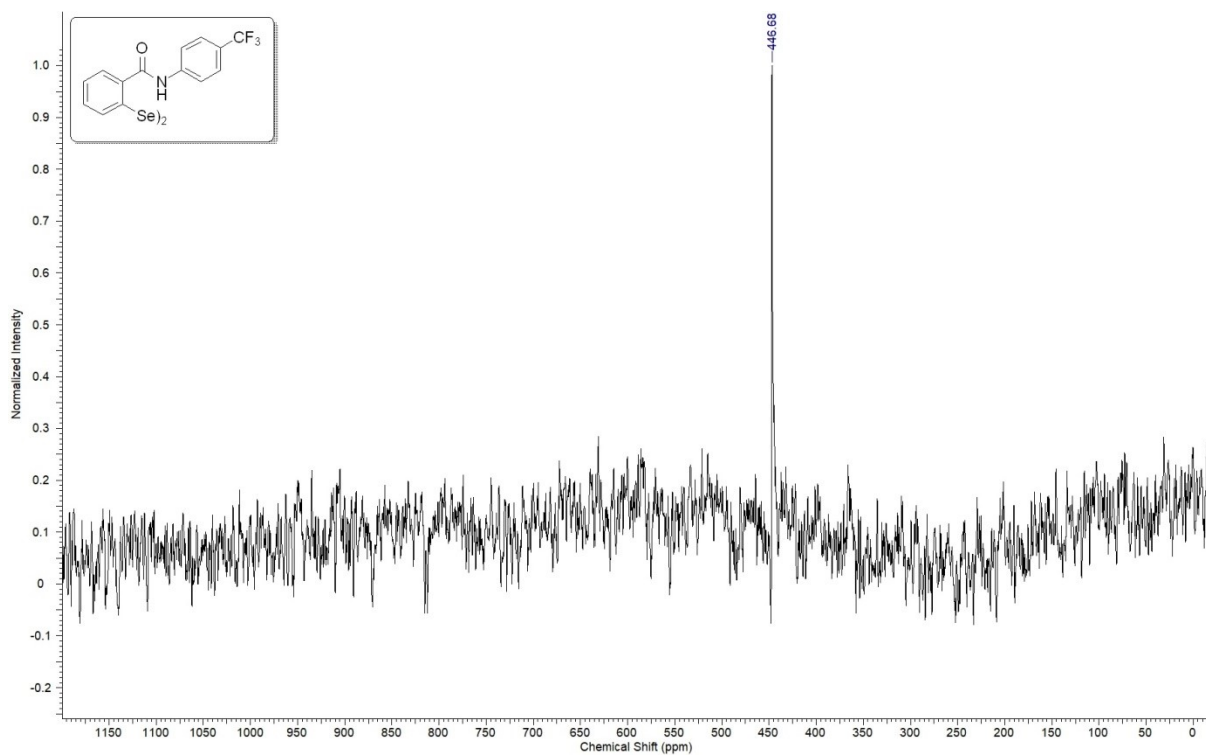

## 2,2'-Diselenobis((2-(Trifluoromethyl)phenyl)benzamide) 22a

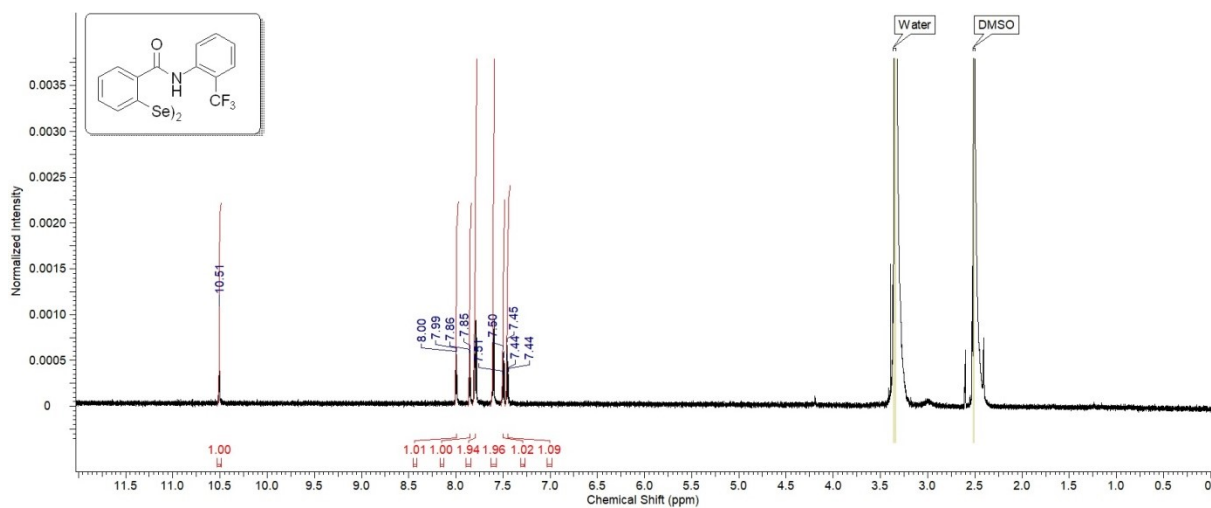



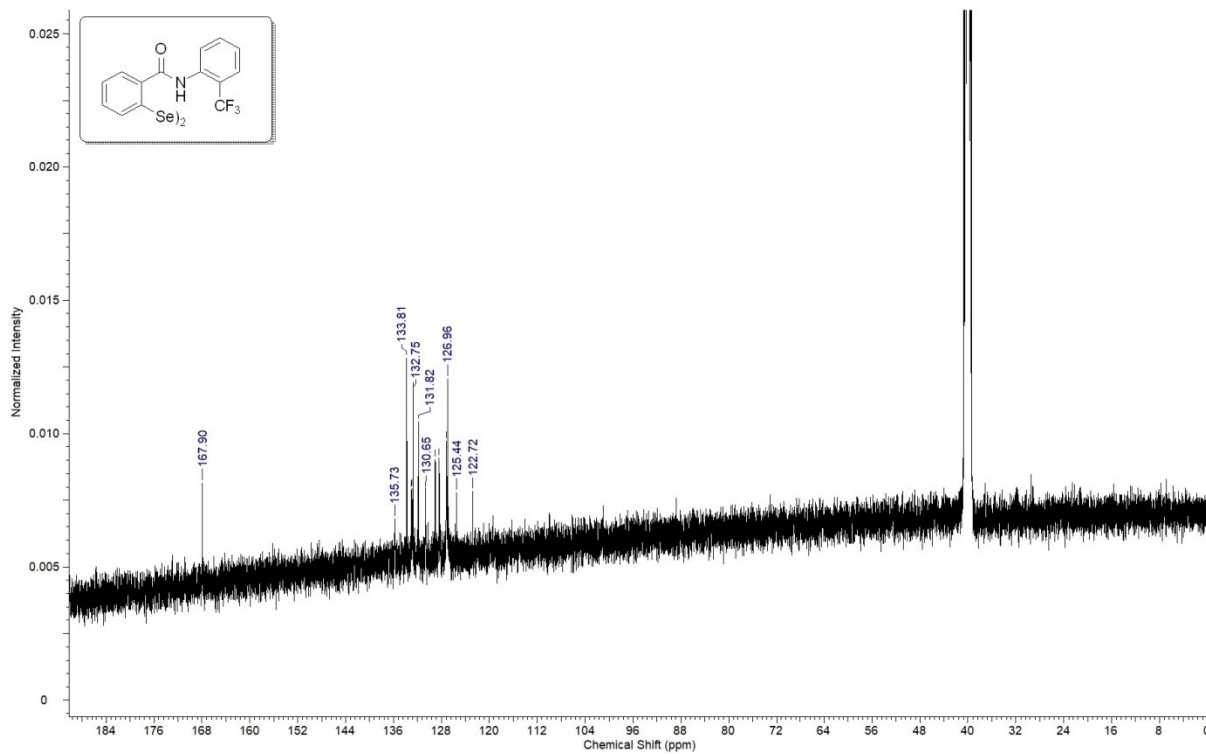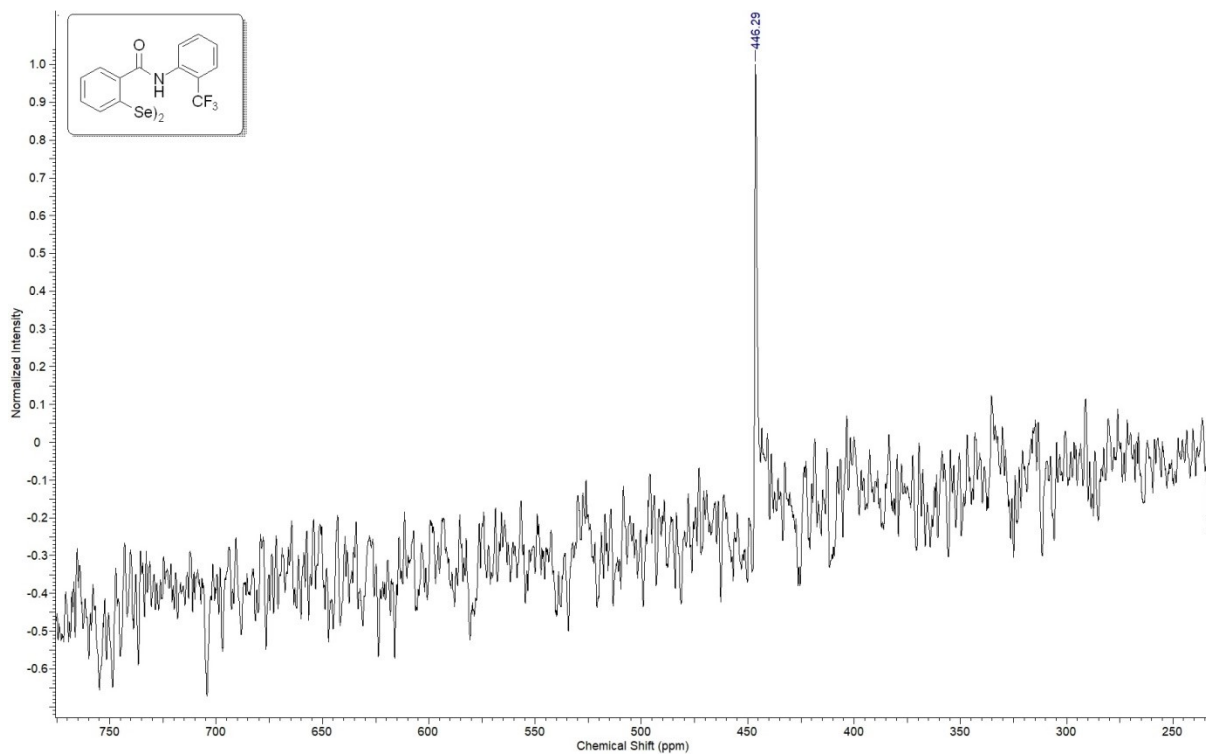

IV. <sup>1</sup>H NMR spectra for compounds **10-20** and **12a-20a**.

**2,2'-Diselenobis(*N*-butylbenzamide) 10<sup>1</sup>**

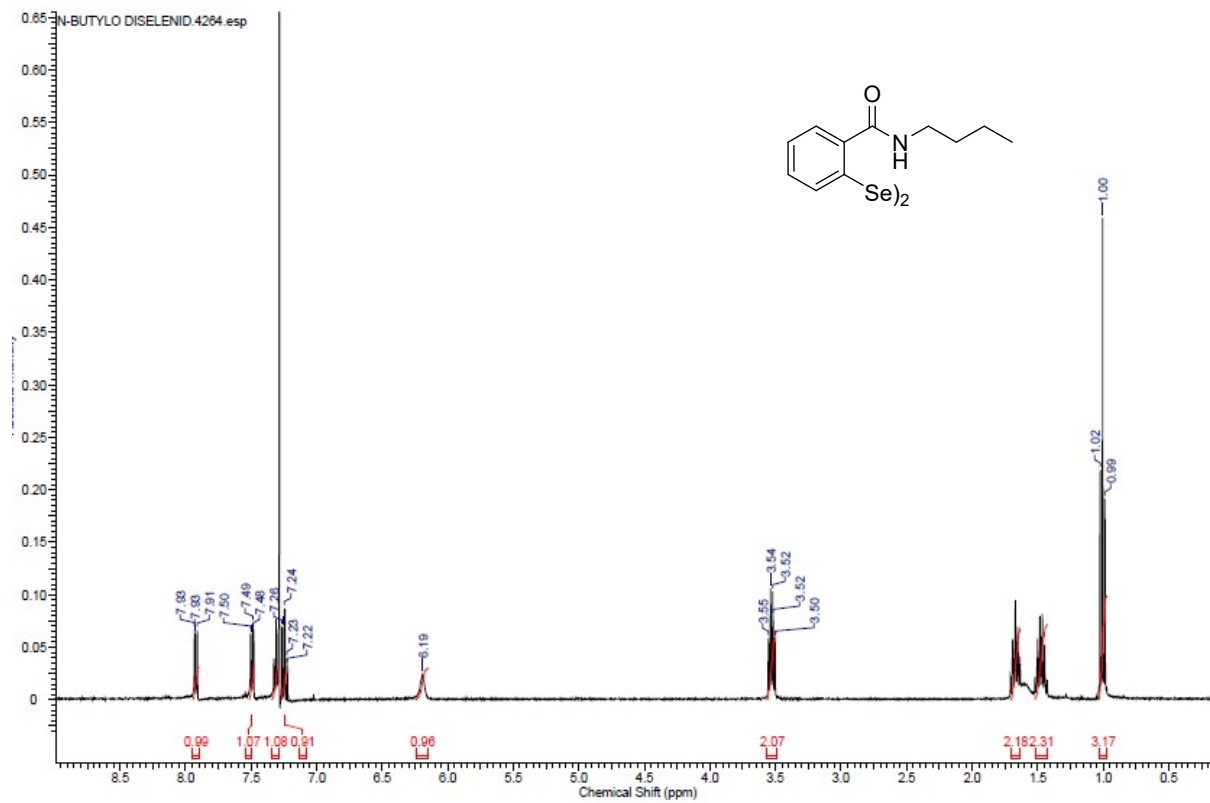

***N*-butyl-1,2-benzisoselenazol-3(2*H*)-one 11<sup>2</sup>**

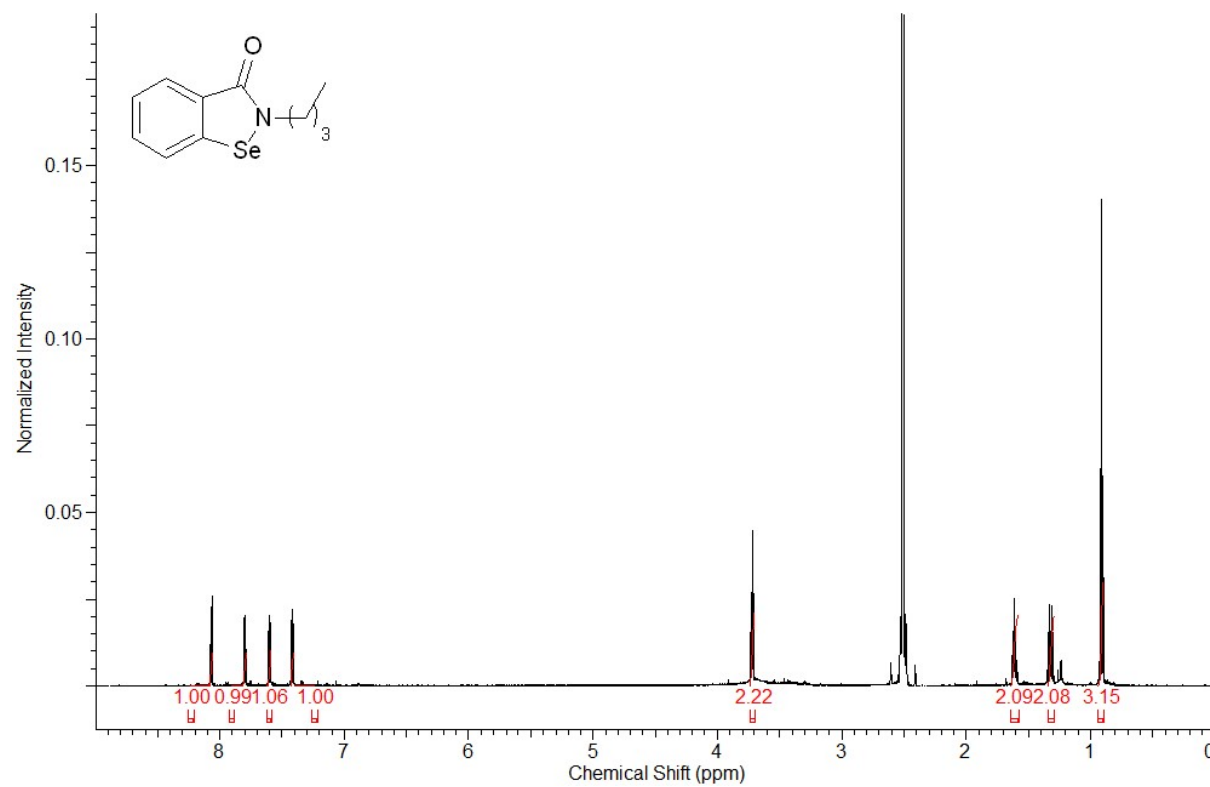

### 2,2'-Diselenobis(*N*-ethylbenzamide) 12a<sup>3</sup>

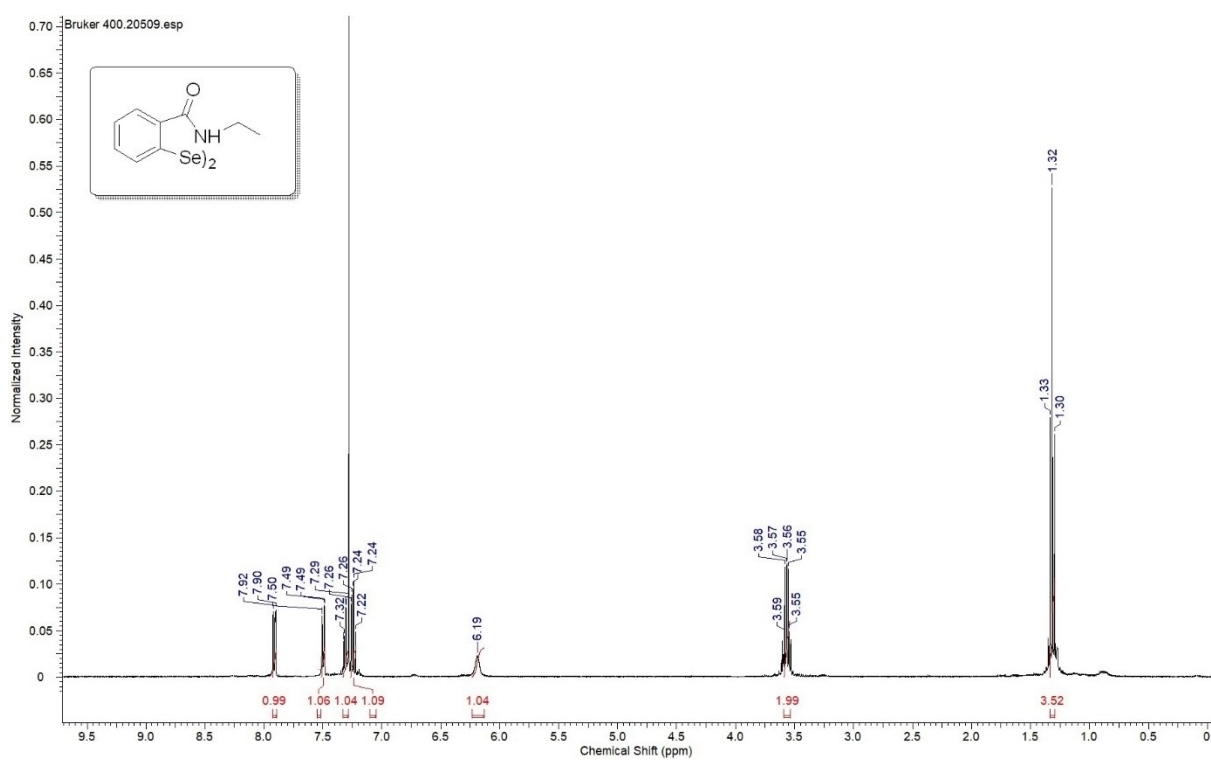

### *N*-ethyl-1,2-benzisoselenazol-3(2*H*)-one 12<sup>4</sup>

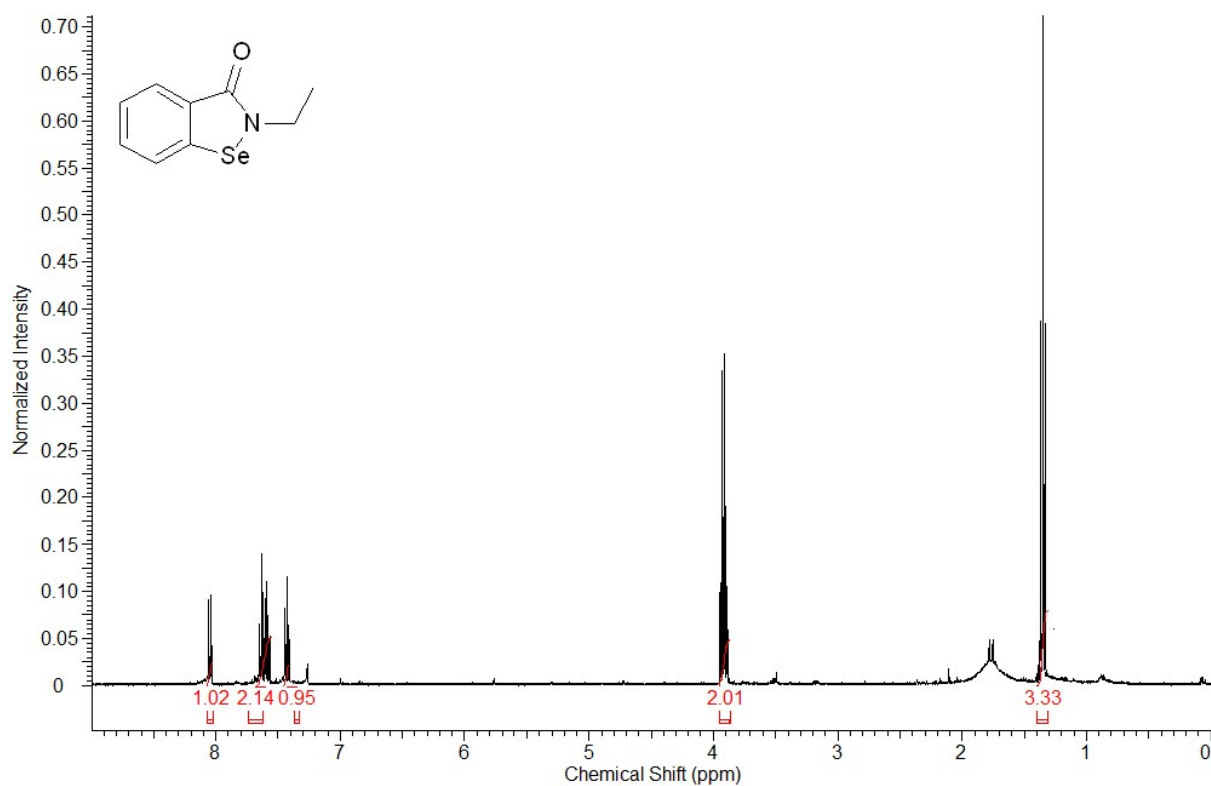

### 2,2'-Diselenobis(*N*-propylbenzamide) 13a<sup>3</sup>

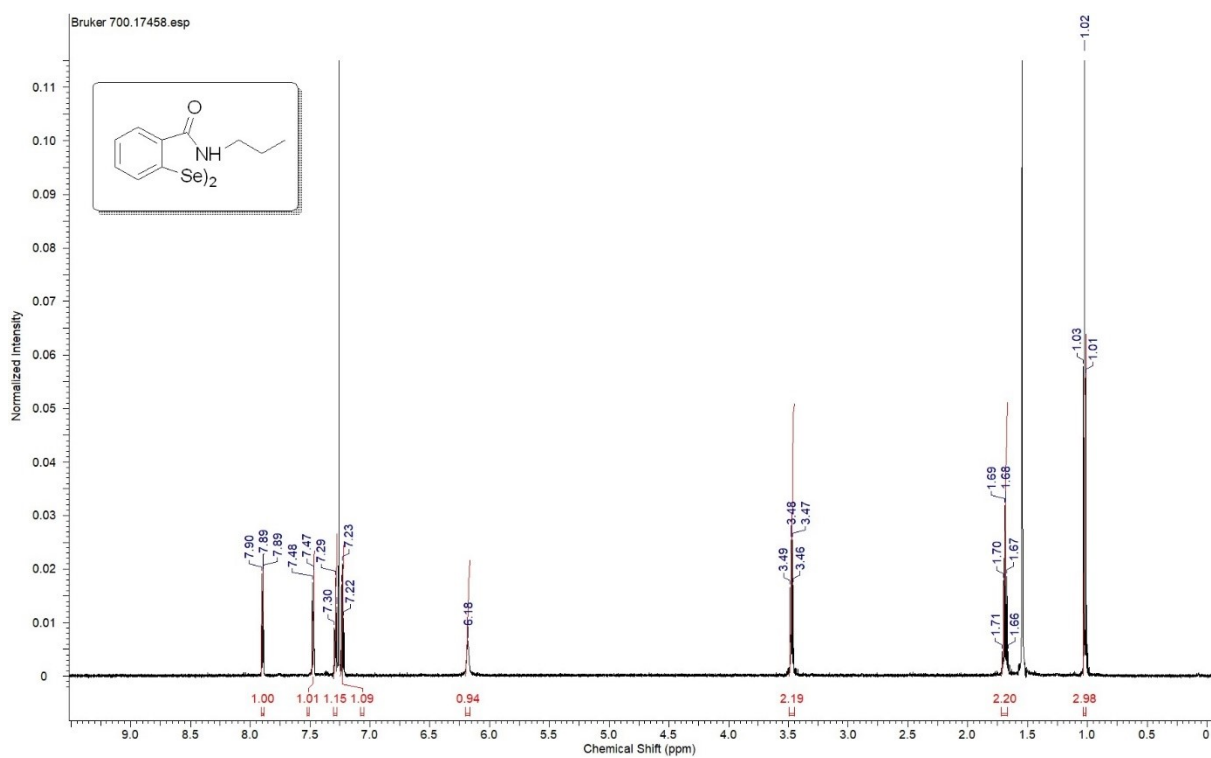

### *N*-propyl-1,2-benzisoselenazol-3(2*H*)-one 13<sup>4</sup>

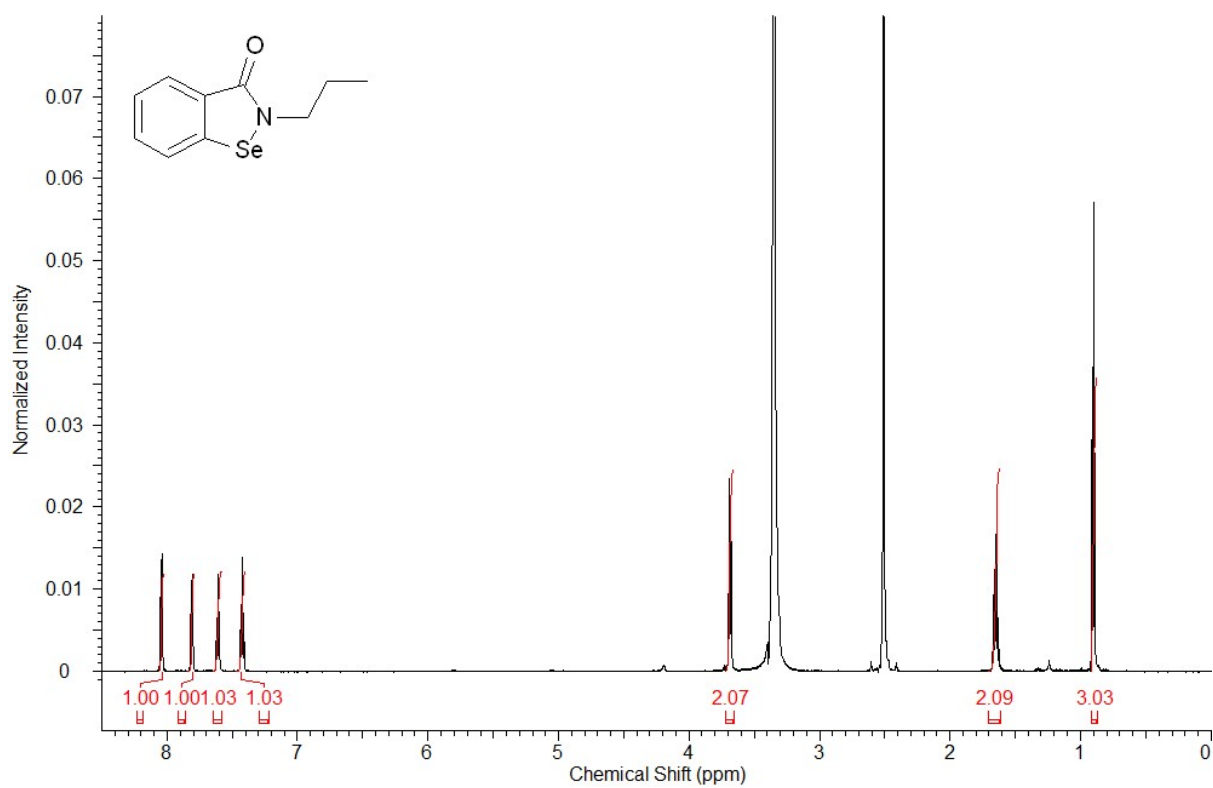

### 2,2'-diselenobis[*N*-(*R*)-(-)-*sec*-butylbezamide 14a<sup>5</sup>

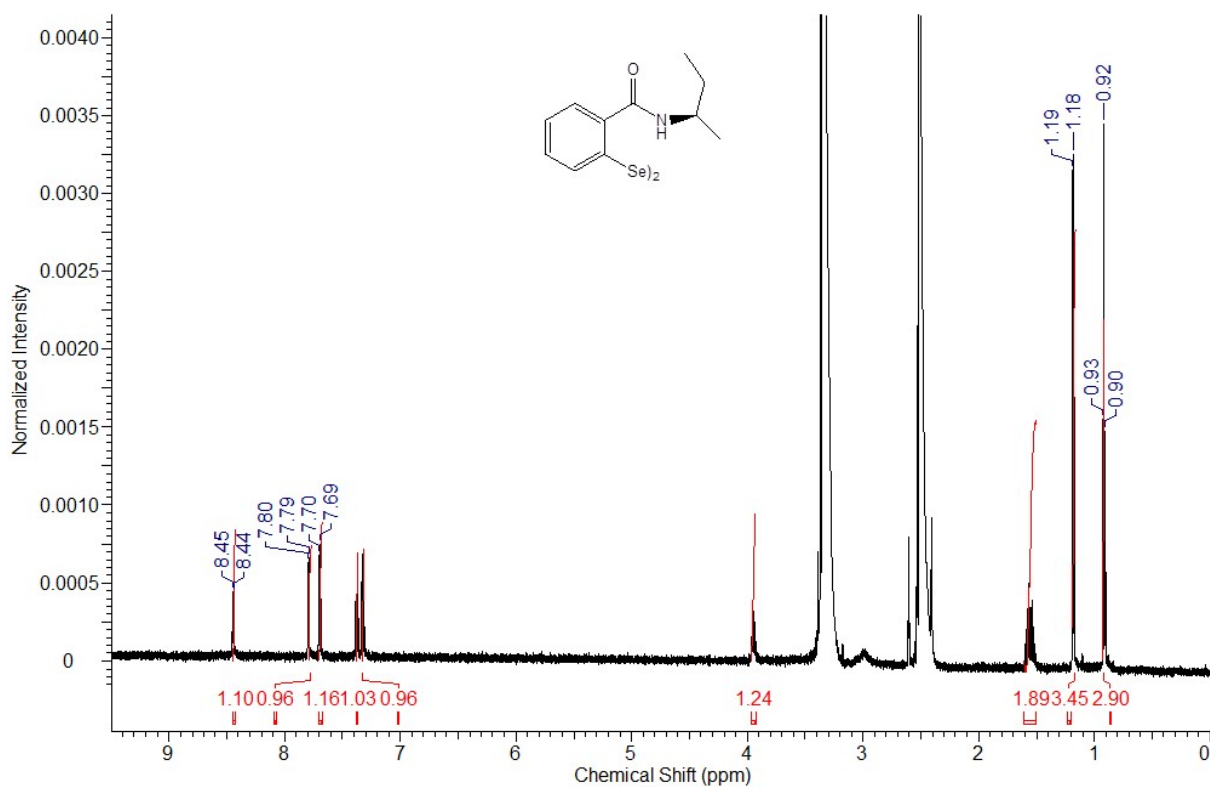

### *N*-[(*R*)-(-)-*sec*-butyl]-1,2-benzisoselenazol-3(2*H*)-one 14<sup>5</sup>

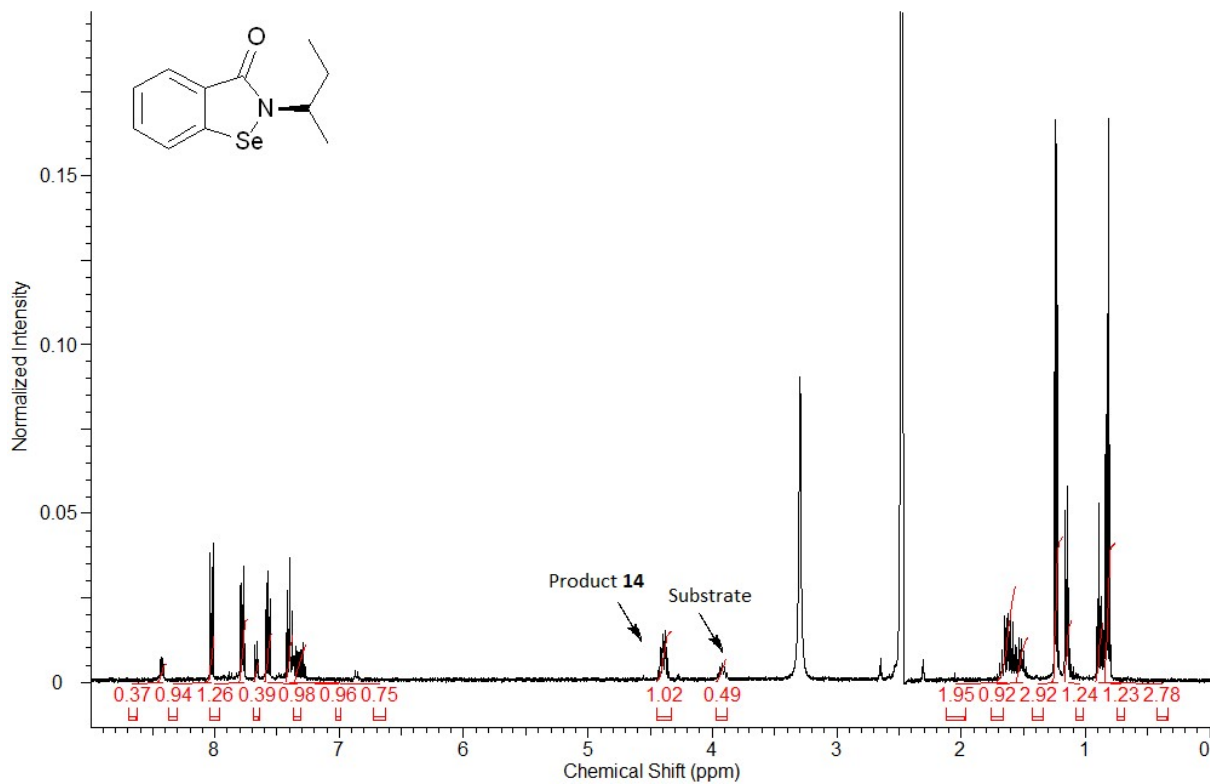

**2,2'-diselenobis[*N*-(*S*)-(+)-1-hydroxy-2-butanylbezamide] 15a<sup>5</sup>**

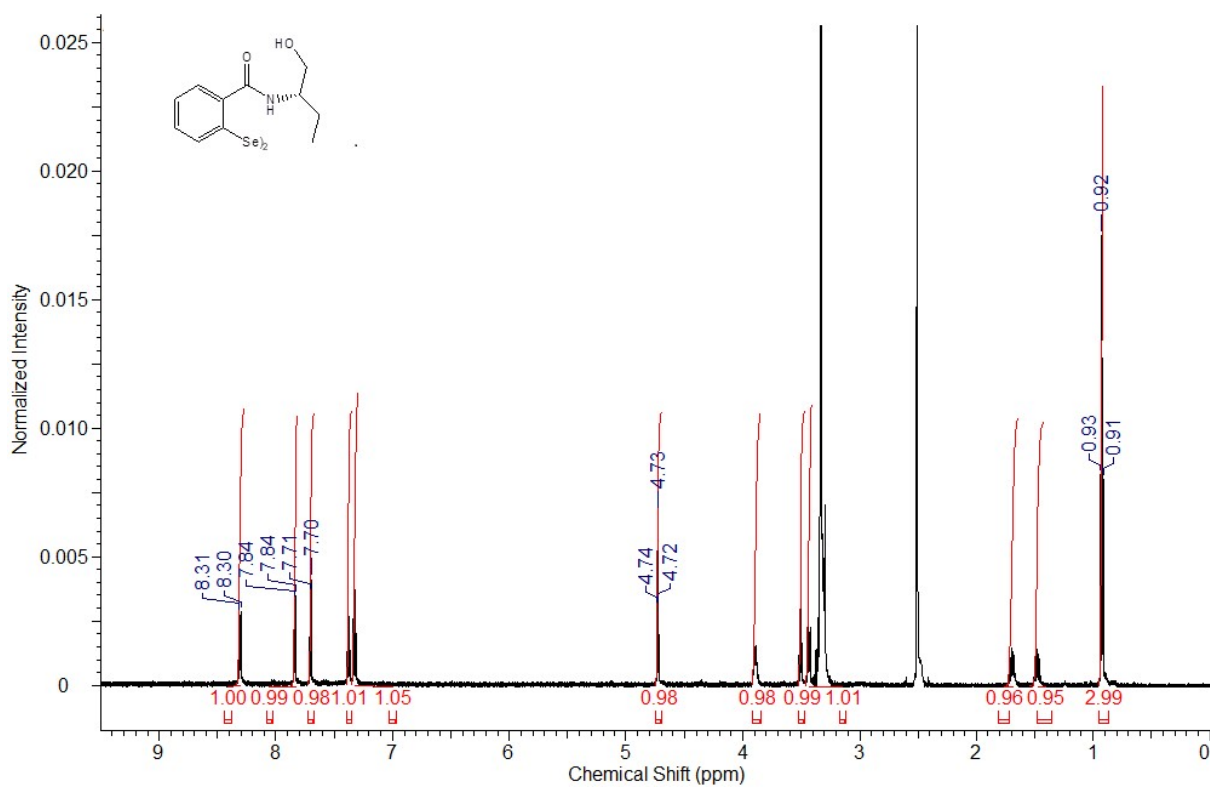

***N*-[(*S*)-(+)-1-hydroxy-2-butanyl]-1,2-benzisoselenazol-3(2*H*)-one 15<sup>5</sup>**

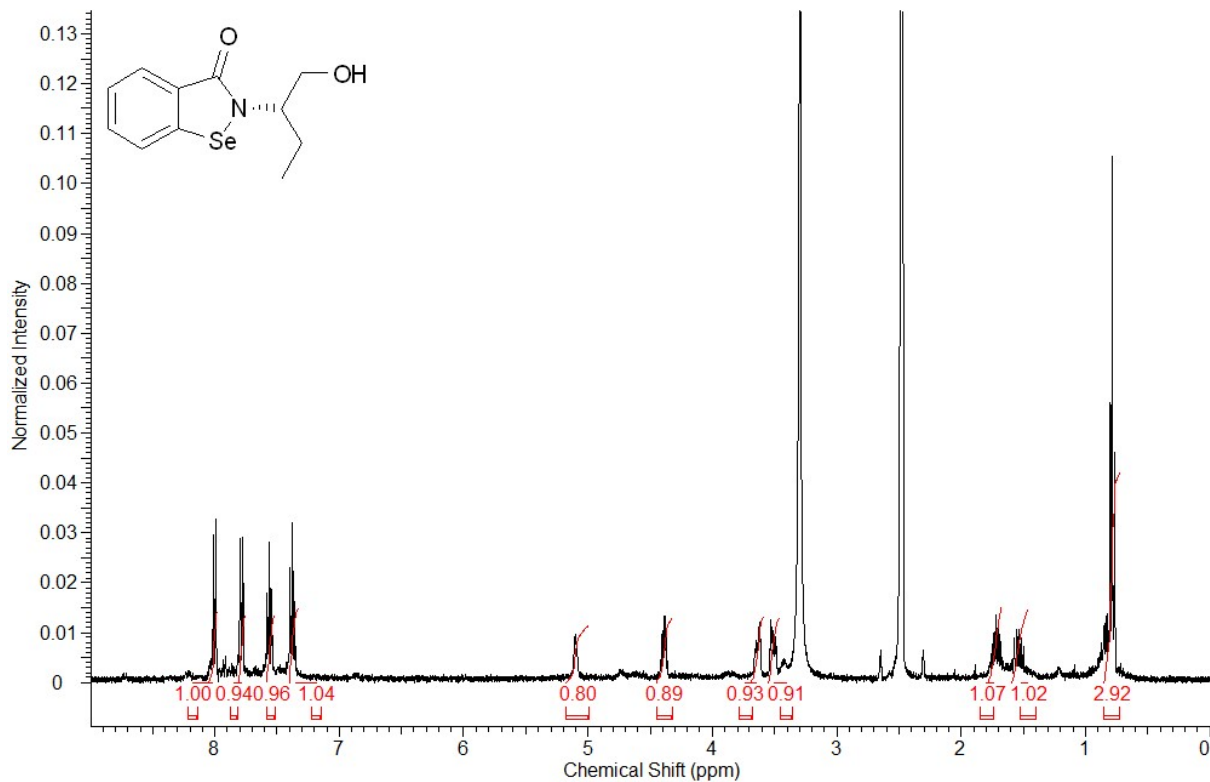

**2,2'-diselenobis[*N*-(*S*)-(-)- $\alpha$ -methylbenzylbezamide]16a<sup>5</sup>**

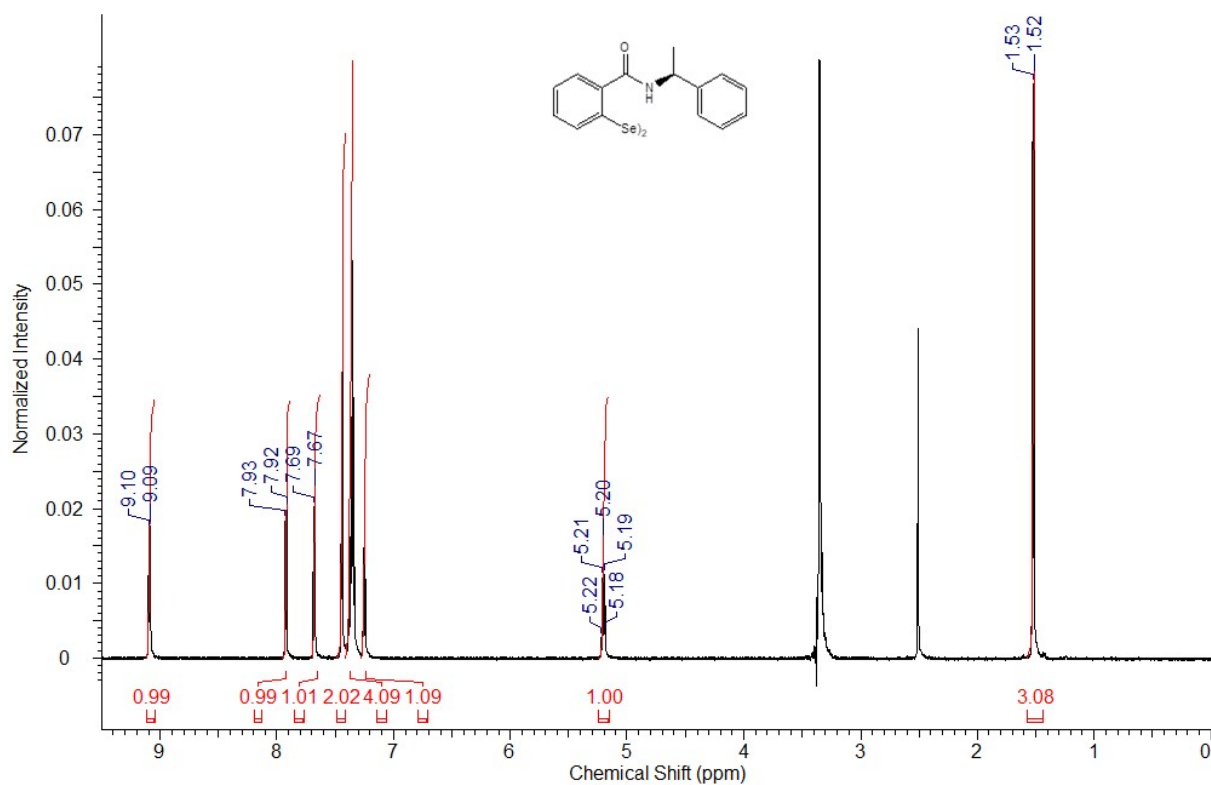

***N*-[(*S*)-(-)- $\alpha$ -methylbenzyl]-1,2-benzisoselenazol-3(2*H*)-one 16<sup>5</sup>**

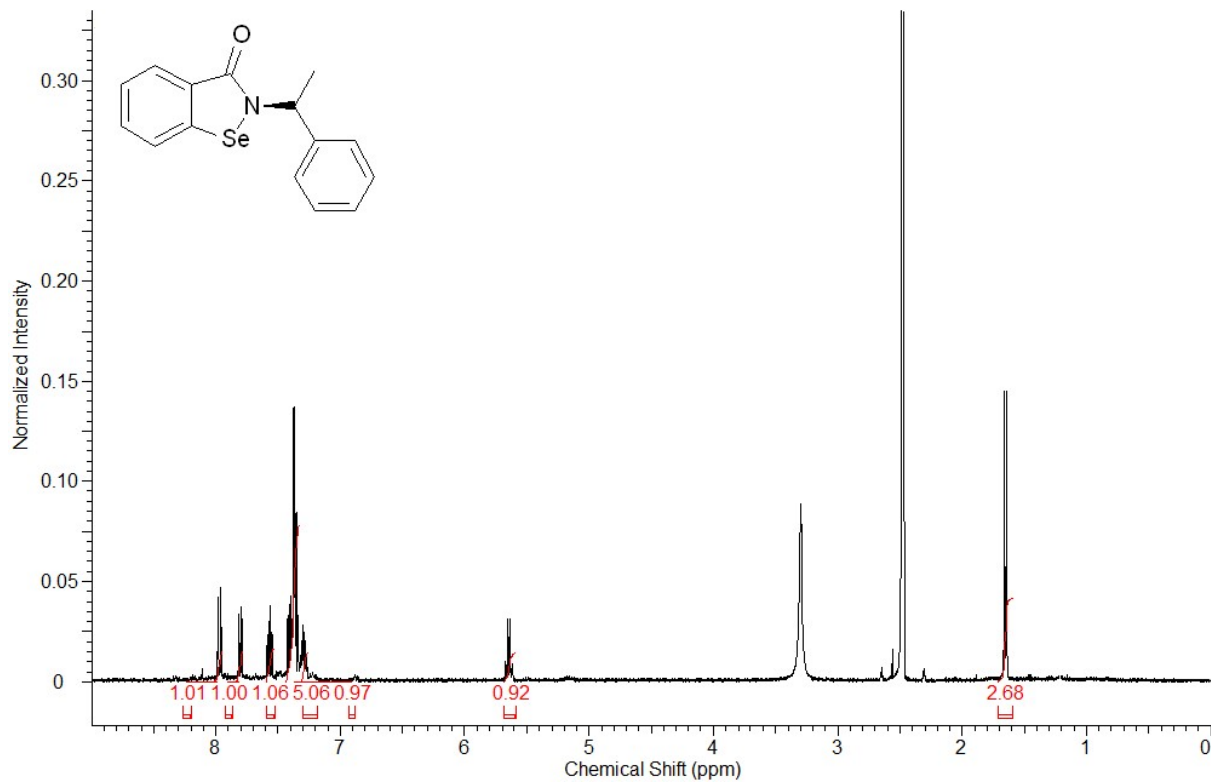

**2,2'-diselenobis[*N*-(1*S*,2*S*)-(-)-*trans*-2-hydroxy-1-indanyl]bezamide] 17a<sup>5</sup>**

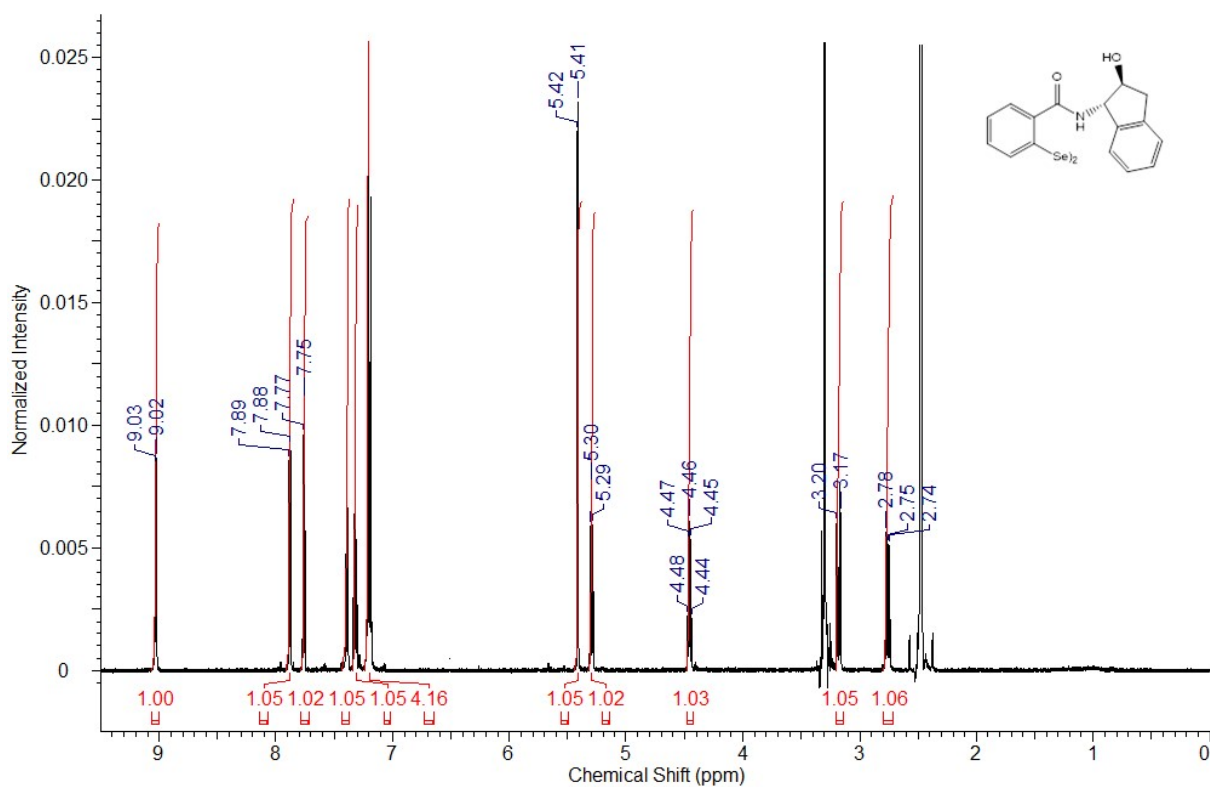

***N*-(1*S*,2*S*)-(+)-*trans*-2-hydroxy-1-indanyl]-1,2-benzisoselenazol-3(2*H*)-one 17<sup>5</sup>**

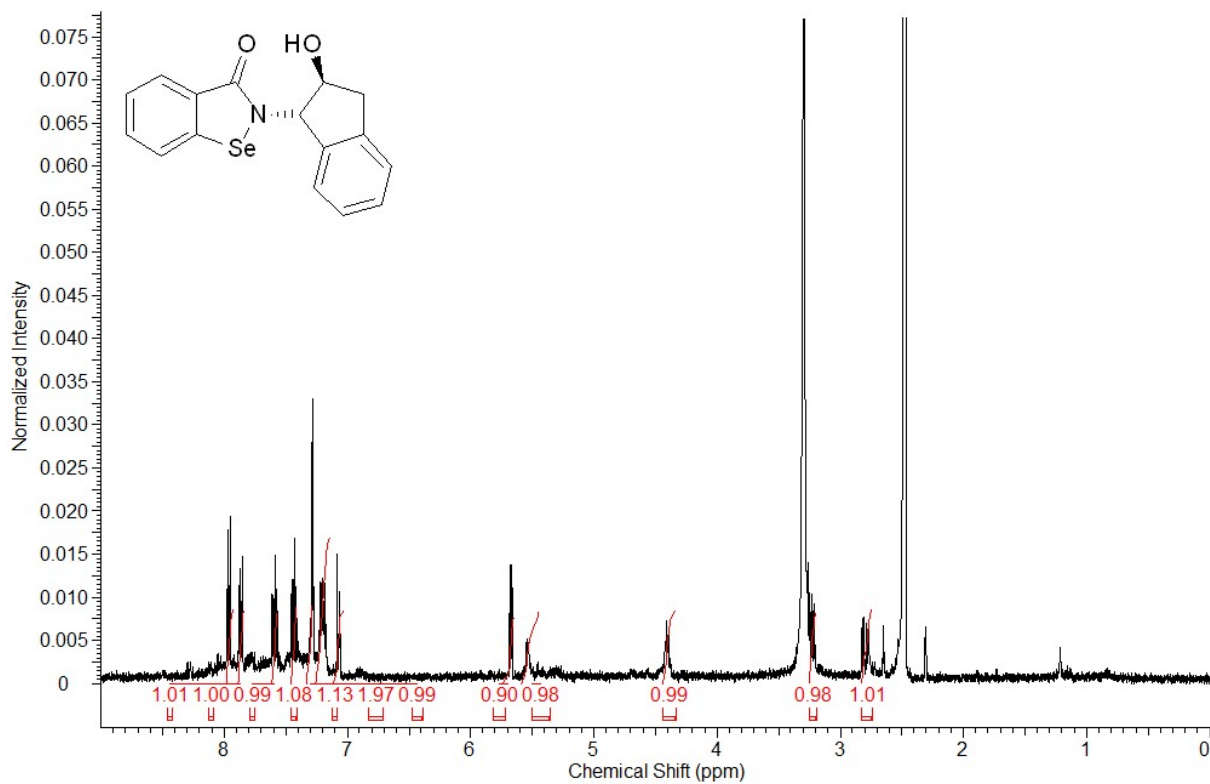



### 2,2'-Diselenobis(*N*-cyclohexylbenzamide) 18a<sup>1</sup>

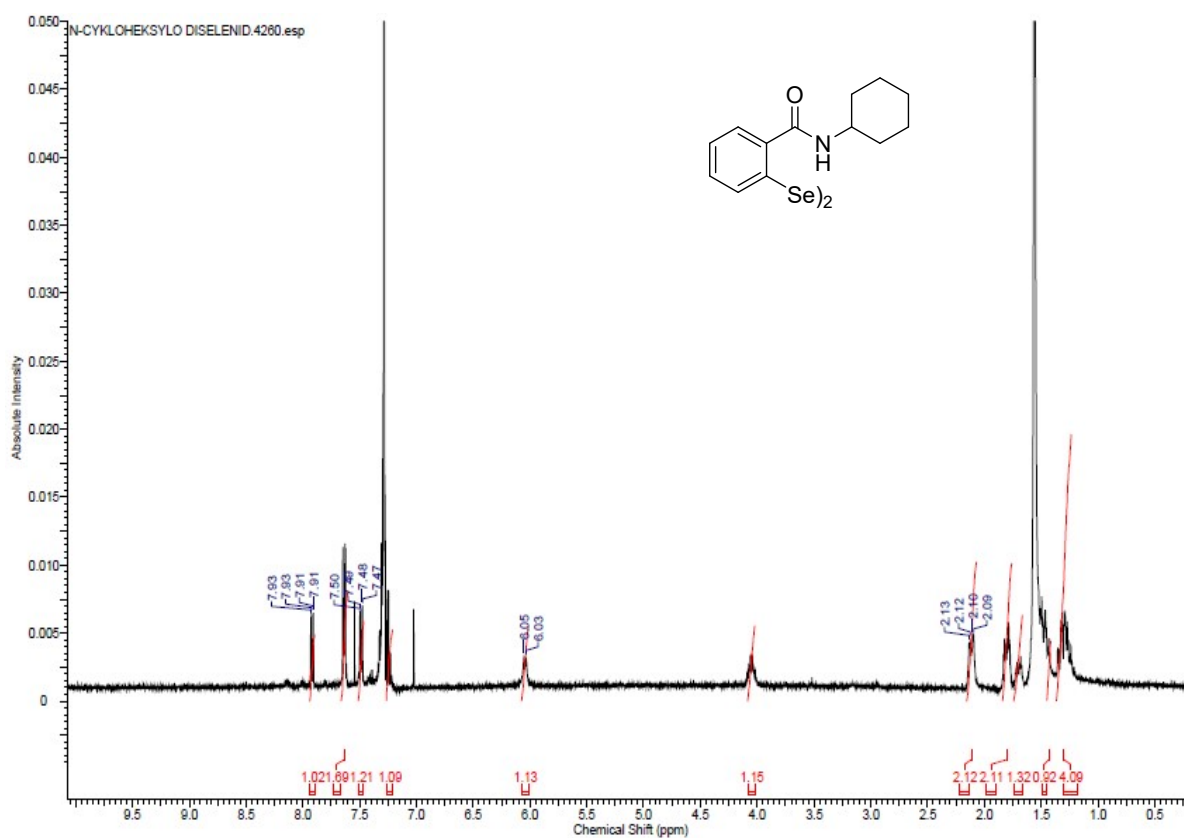

### *N*-cyclohexyl-1,2-benzisoselenazol-3(2*H*)-one 18<sup>2</sup>

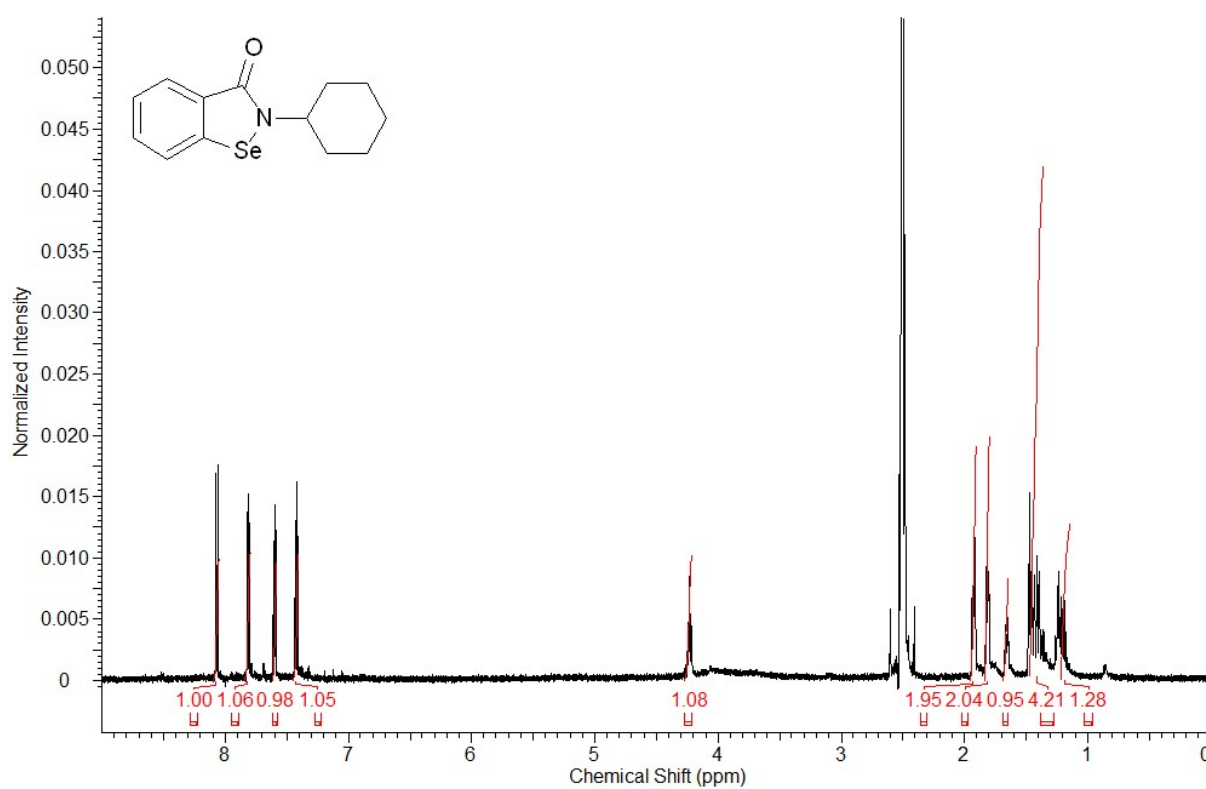

### 2,2'-Diselenobis(*N*-phenylbenzamide) 19a<sup>6</sup>

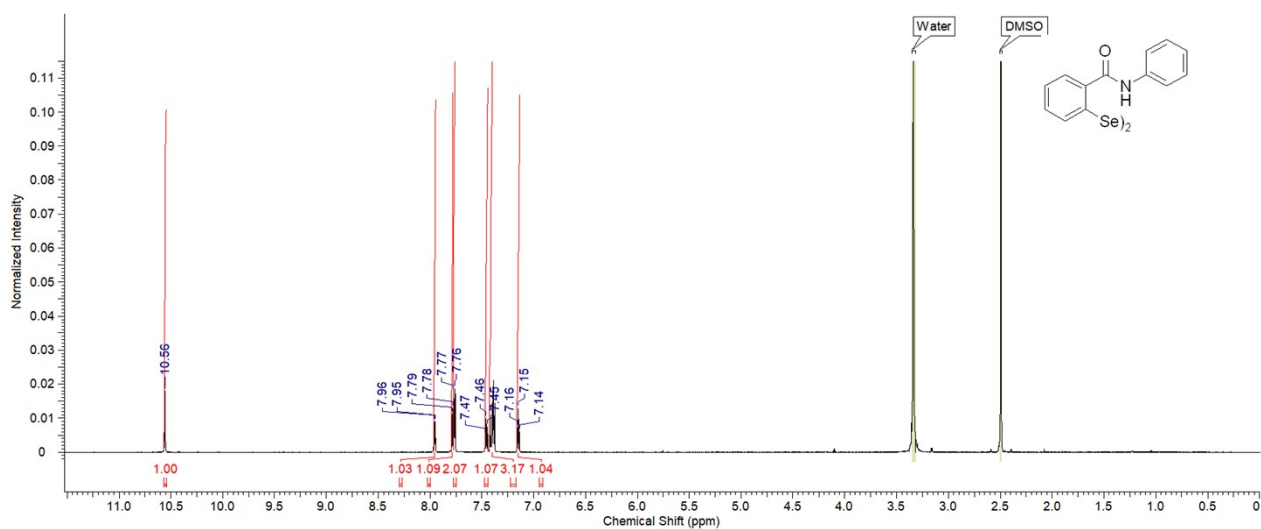

### *N*-phenyl-1,2-benzisoselenazol-3(2*H*)-one 19<sup>6</sup>

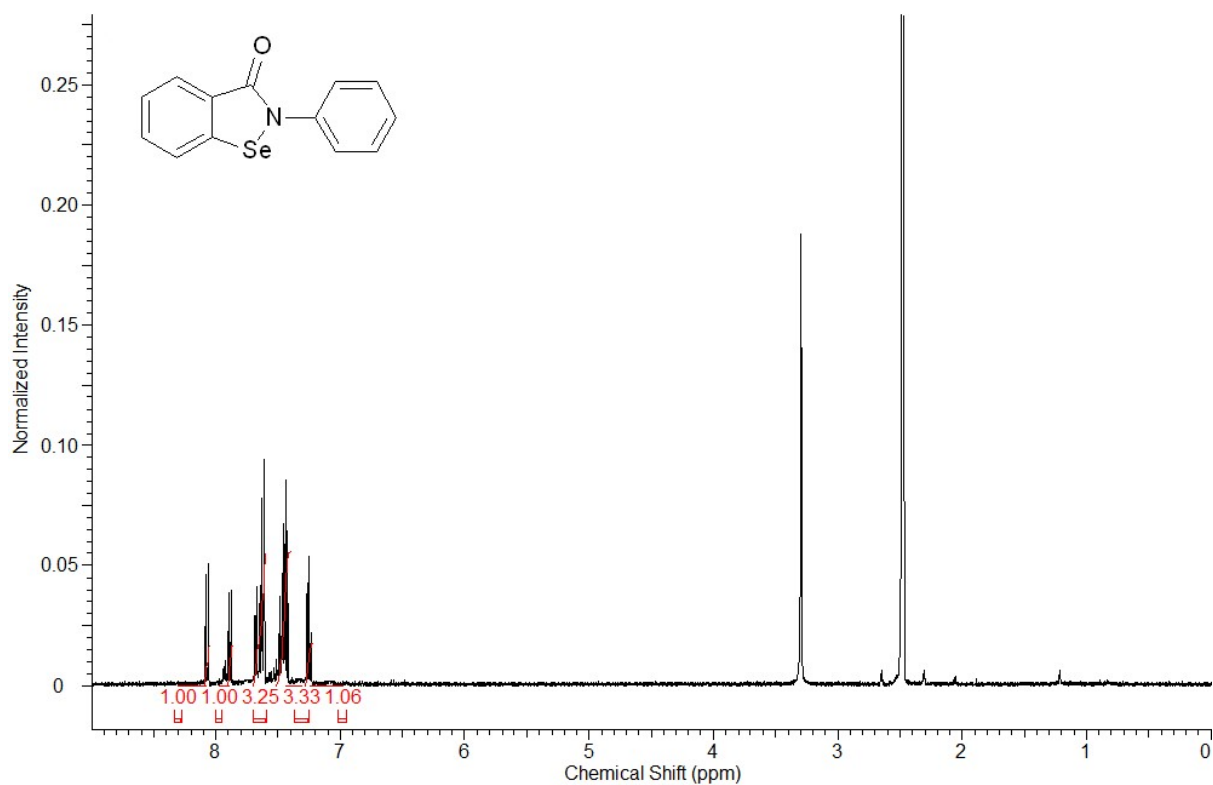

### 2,2'-Diselenobis(*N*-(4-methoxyphenyl)benzamide) 20a<sup>6</sup>

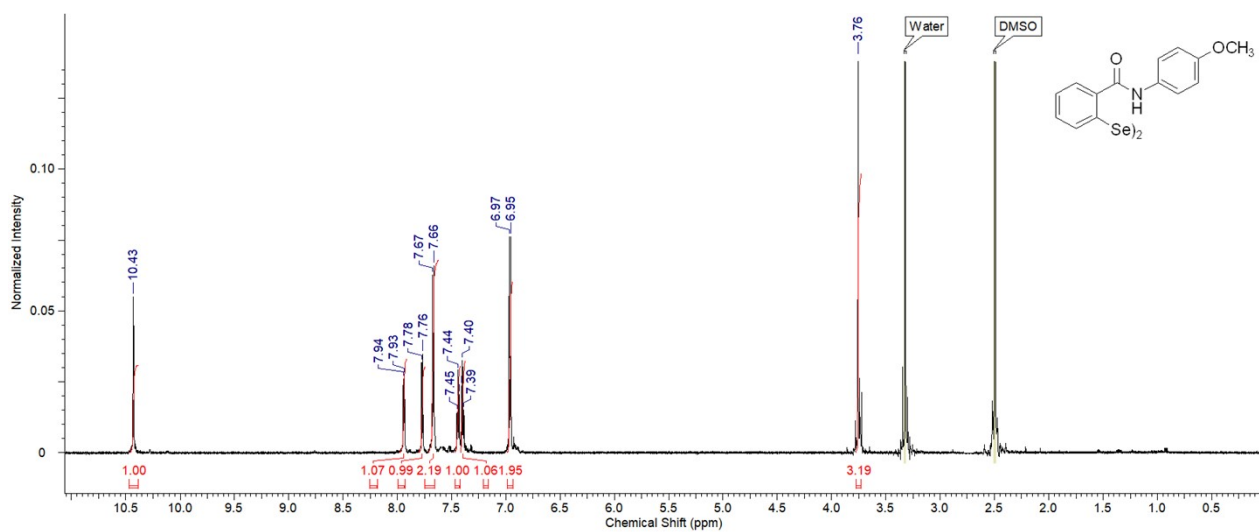

### *N*-(4-methoxyphenyl)-1,2-benzisoselenazol-3(2*H*)-one 20<sup>6</sup>

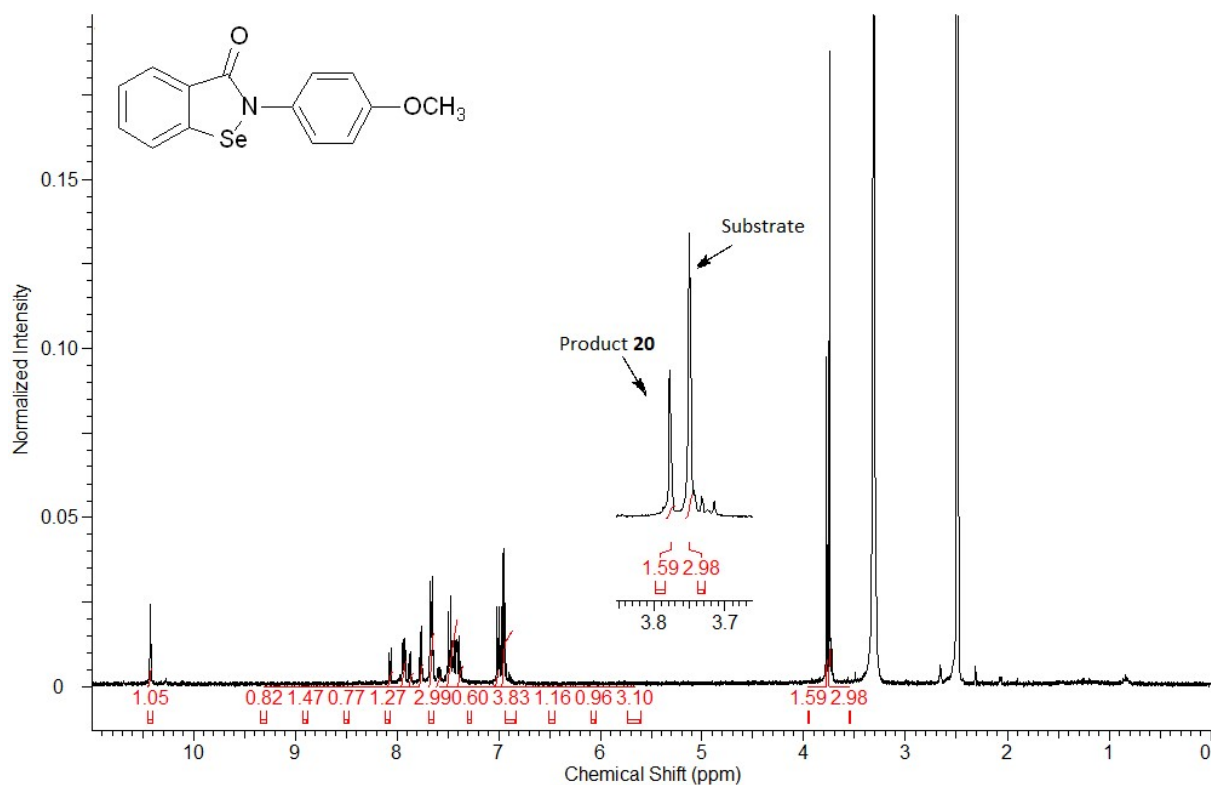

## V. References

1. A. J. Pacuła, K. B. Kaczor, A. Wojtowicz, J. Antosiewicz, A. Janecka, A. Długosz, T. Janecki, J. Scianowski, *Bioorg. Med. Chem.*, **2017**, *25*, 126–131.
2. A. J. Pacuła, J. Ścianowski and K. B. Aleksandrak, *RSC Adv.* **2014**, *4*, 48959–48962.
3. M. Pietka-Ottlik, P. Potaczek, E. Piasecki, J. Mlochowski, *Molecules* **2010**, *15*, 8214-8228.
4. M. Obieziurska, A. J. Pacuła, U. Juhas, J. Antosiewicz, J. Ścianowski, *Catalysts* **2018**, *8*, 493-507.
5. A. Laskowska, A. J. Pacuła-Miszewska, A. Długosz-Pokorska, A. Janecka, A. Wojtczak, J. Scianowski, *Materials*, **2022**, *15*, 2068-2082.
6. A. J. Pacuła, M. Obieziurska, J. Ścianowski, K. B. Kaczor, J. Antosiewicz, *Arkivoc*, **2018**, *3*, 144-155.
